# Supplementary material for: Spatiotemporal Analysis of Landscape Ecological Risk and Driving Factors: A Case Study in the Three Gorges Reservoir Area, China
Source: MDPI journal article supplement (doi:10.3390/rs15194884), 2023-10-09
Supplement: s1 [file s1]

**Table S1.** The formula and meaning of landscape indices.

| Index name                             | Formula                                                                                                                                                                                                                                     | Index meaning                                                                                                                                            |
|----------------------------------------|---------------------------------------------------------------------------------------------------------------------------------------------------------------------------------------------------------------------------------------------|----------------------------------------------------------------------------------------------------------------------------------------------------------|
| Patch Density (PD)                     | $PD = \frac{n_i}{A}$                                                                                                                                                                                                                        | Number of patches per unit area                                                                                                                          |
| Edge Density (ED)                      | $ED = \frac{E}{A} \times 10^6$                                                                                                                                                                                                              | The total length of all edge segments per unit area for patches                                                                                          |
| Percentage of Landscape (PLAND)        | $PLAND = \frac{\sum_{j=1}^n a_{ij}}{A} \times 100$                                                                                                                                                                                          | Area percentage of a certain landscape type                                                                                                              |
| Landscape Shape Index (LSI)            | $LSI = \frac{0.25E}{\sqrt{A}}$                                                                                                                                                                                                              | A modified perimeter-area ratio of the form that measures the class shape complexity of the whole landscape                                              |
| Largest Patch Index (LPI)              | $LPI = \frac{MAX(a_1 a_2 \cdots a_n)}{A} \times 100$                                                                                                                                                                                        | The proportion of the largest patch area in the landscape to the total landscape area                                                                    |
| Proportion of Like Adjacencies (PLADJ) | $PLADJ = \frac{a_i}{\sum_{j=1}^n a_{ij}} \times 100$                                                                                                                                                                                        | Degree of contiguity of the landscape                                                                                                                    |
| Aggregation Index (AI)                 | $AI = \left[ \frac{g_{ii}}{\max \rightarrow g_{ii}} \right] \times 100$                                                                                                                                                                     | Degree of aggregation of landscape patches                                                                                                               |
| Contagion Index (CONTAG)               | $CONTAG = \left[ 1 + \frac{\sum_{i=1}^m \sum_{k=1}^m \left[ (p_i) \left( \frac{g_{ik}}{\sum_{k=1}^m g_{ik}} \right) \right] \left[ \ln(p_i) \left( \frac{g_{ik}}{\sum_{k=1}^m g_{ik}} \right) \right] g_{ii}}{2 \ln(m)} \right] \times 100$ | Degree of aggregation or extension trends of different patch types in the landscape                                                                      |
| Shannon's Diversity Index (SHDI)       | $SHDI = \sum_{i=1}^n (P_i \ln P_i)$                                                                                                                                                                                                         | Reflecting landscape heterogeneity. The increase in SHDI indicates an increase in patch types or a balanced distribution of patch types in the landscape |

*A*: total area of the landscape, *i* and *j*: different patch types, *E*: total length of all patch boundaries in the landscape, *n*: total number of patches, *a*: area of patches, *g*: number of adjacent patches, *p*: percentage of area occupied by patches, *m*: total number of patch types.
