# Supplementary material for: Spatiotemporal Analysis of Landscape Ecological Risk and Driving Factors: A Case Study in the Three Gorges Reservoir Area, China
Source: MDPI journal article supplement (doi:10.3390/rs15194884), 2023-10-09
Supplement: s1 [file s1]

Archive with 1 entries (1 files):
- remotesensing-2605421-supplementary.pdf
